# Supplementary material for: Association between nutrient intake related to the one-carbon metabolism and colorectal cancer risk: a case–control study in the Basque Country
Source: Springer Nature journal article supplement (doi:10.1007/s00394-023-03229-2), 2023-08-06
Supplement: MOESM1 [file 25893506]

**Association between nutrient intake related to the one-carbon metabolism and colorectal cancer risk: a case-control study in the Basque Country**

Silvia Martín-Fernández-de Labastida, Iker Alegria-Lertxundi, Marian M. de Pancorbo, Marta Arroyo-Izaga\*

\*Correspondence: Marta Arroyo-Izaga, BIOMICs Research Group, Microfluidics & BIOMICs Cluster, Department of Pharmacy and Food Sciences, University of the Basque Country UPV/EHU, 01006 Vitoria-Gasteiz, Araba/Álava, Spain; Bioaraba, BA04.03, Vitoria-Gasteiz, Araba/Álava, Spain. [marta.arroyo@ehu.eus](mailto:marta.arroyo@ehu.eus)

**Supplementary Table S1.** Descriptive socio-demographic and clinical data of the participants (cases vs controls)

| Characteristics     | Cases (n=308) |     | Controls (n=308) |     | <i>p</i> |
|---------------------|---------------|-----|------------------|-----|----------|
| Sex, % of men       | 66.2          |     | 66.2             |     |          |
| Age, y, mean SD     | 61.5          | 5.2 | 61.1             | 5.5 | 0.093    |
| Smoking status, %   |               |     |                  |     |          |
| Never               | 27.9          |     | 38.6             |     |          |
| Past/current        | 72.1          |     | 61.4             |     | 0.004    |
| BMI, %              |               |     |                  |     |          |
| Underweight         | 6.5           |     | 7.8              |     |          |
| Normal weight       | 26.0          |     | 34.1             |     |          |
| Overweight/obesity  | 67.5          |     | 58.1             |     | 0.033    |
| PRM, % <sup>1</sup> |               |     |                  |     |          |
| L <sub>1.2</sub>    | 15.6          |     | 12.3             |     |          |
| L <sub>3.4</sub>    | 83.4          |     | 79.2             |     | <0.001   |
| DI, % <sup>1</sup>  |               |     |                  |     |          |
| Q <sub>1.3</sub>    | 47.1          |     | 65.6             |     |          |
| Q <sub>4.5</sub>    | 18.8          |     | 29.5             |     | <0.001   |

<sup>1</sup>Valid percentages

*BMI* body mass index, *DI* deprivation index (this index was successfully assigned to 80.2% of the study sample), *L* level, *PRM* predictive risk modelling (this index was successfully assigned to 95.1% of the study sample), *Q* quintile, *SD* standard deviation

**Supplementary Table S2.** Daily intake of one-carbon metabolism nutrients in cases and control studied

| Daily nutrient intake                  | Cases (n=308) |                   |        |        |        | Controls (n=308) |       |        |        |         | <i>p</i> <sup>a</sup> |
|----------------------------------------|---------------|-------------------|--------|--------|--------|------------------|-------|--------|--------|---------|-----------------------|
|                                        | Mean          | SD                | Median | P25    | P75    | Mean             | SD    | Median | P25    | P75     |                       |
| <i>Vitamins related to OCM</i>         |               |                   |        |        |        |                  |       |        |        |         |                       |
| Vitamin B <sub>2</sub> , mg/d          | 1.5           | 0.5               | 1.4    | 1.2    | 1.7    | 1.6              | 0.5   | 1.5    | 1.2    | 1.9     | 0.100                 |
| Vitamin B <sub>3</sub> , mg/d          | 30.1          | 7.1               | 30.2   | 24.3   | 35.0   | 30.3             | 7.7   | 29.7   | 25.2   | 34.0    | 0.893                 |
| Vitamin B <sub>6</sub> , mg/d          | 2.7           | 14.3              | 1.8    | 1.5    | 2.1    | 1.9              | 0.6   | 1.8    | 1.5    | 2.2     | 0.378                 |
| Folate, µg/d                           | 267.2         | 80.1              | 261.0  | 209.0  | 307.0  | 273.3            | 76.5  | 261.5  | 217.3  | 325.0   | 0.406                 |
| Vitamin B <sub>12</sub> , µg/d         | 6.6           | 28.5 <sup>b</sup> | 4.8    | 3.8    | 6.0    | 4.9              | 1.7   | 4.5    | 3.7    | 5.8     | 0.094                 |
| <i>Other dietary methyl donors</i>     |               |                   |        |        |        |                  |       |        |        |         |                       |
| Methionine, mg/d                       | 1753.7        | 644.6             | 1717.5 | 1218.5 | 2146.3 | 1894.2           | 747.6 | 1810.5 | 1255.8 | 2473.00 | <b>0.012</b>          |
| Choline, mg/d                          | 134.7         | 85.4              | 120.5  | 80.8   | 170.0  | 163.2            | 85.0  | 147.0  | 99.3   | 212.8   | <b>&lt;0.001</b>      |
| Betaine, mg/d                          | 113.6         | 55.2              | 101.5  | 71.4   | 144.8  | 151.0            | 62.9  | 141.5  | 102.0  | 187.8   | <b>&lt;0.001</b>      |
| <i>Methyl donor index</i> <sup>c</sup> | -4.1          | 1.3               | -4.1   | -4.9   | -3.2   | -4.0             | 1.3   | -4.0   | -4.8   | -3.1    | 0.653                 |

<sup>a</sup>Differences between cases and controls. A value of  $p < 0.05$  was considered significant. Significant results are highlighted in bold

<sup>b</sup>This high SD is due to the use of a nutritional supplement by one of the cases

<sup>c</sup>This variable follows a normal distribution (the rest of the variables follow a non-normal distribution). This index was derived by summing standardized intake values on the log scale [(value – mean)/SD] across the 8 individual nutrients

*Met* Methionine, *OCM* one-carbon metabolism, *P25* 25 percentile, *P75* 75 percentile, *SD* standard deviation

**Supplementary Table S3.** Top five food sources of total choline and betaine among control subjects

| Food sources         | Proportion |
|----------------------|------------|
| <b>Total choline</b> |            |
| Eggs                 | 24.9       |
| Sausage              | 7.9        |
| Lentils              | 7.9        |
| Beef                 | 5.8        |
| Tuna                 | 5.3        |
| <b>Betaine</b>       |            |
| Pasta                | 48.1       |
| Green beans          | 17.5       |
| Potatoes             | 11.1       |
| Beef                 | 8.5        |
| Lettuce              | 4.9        |

**Supplementary Table S4.** Association between the intake of nutrients related to one-carbon metabolism and colorectal cancer risk in men

| Nutrients <sup>a</sup>  | Case/control(n) | Model I <sup>b</sup> |                       | Model II <sup>c</sup> |                       | Model III <sup>d</sup> |                       |
|-------------------------|-----------------|----------------------|-----------------------|-----------------------|-----------------------|------------------------|-----------------------|
|                         |                 | OR (95% CI)          | <i>p</i> <sup>e</sup> | OR (95% CI)           | <i>p</i> <sup>e</sup> | OR (95% CI)            | <i>p</i> <sup>e</sup> |
| Vitamin B <sub>2</sub>  |                 |                      |                       |                       |                       |                        |                       |
| T1                      | 89/82           | 1.00                 | -                     | 1.00                  | -                     | 1.00                   | -                     |
| T2                      | 55/58           | 0.88(0.55-1.40)      | 0.586                 | 0.61(0.33-1.14)       | 0.122                 | 0.50(0.21-1.16)        | 0.108                 |
| T3                      | 60/64           | 0.86(0.54-1.38)      | 0.535                 | 0.47(0.22-0.99)       | 0.046                 | 0.59(0.20-1.79)        | 0.355                 |
| Vitamin B <sub>3</sub>  |                 |                      |                       |                       |                       |                        |                       |
| T1                      | 72/73           | 1.00                 | -                     | 1.00                  | -                     | 1.00                   | -                     |
| T2                      | 56/59           | 0.97(0.58-1.61)      | 0.897                 | 1.09(0.54-2.21)       | 0.813                 | 1.01(0.37-2.77)        | 0.986                 |
| T3                      | 76/72           | 1.07(0.66-1.73)      | 0.779                 | 1.00(0.55-1.83)       | 0.995                 | 1.05(0.31-3.56)        | 0.938                 |
| Vitamin B <sub>6</sub>  |                 |                      |                       |                       |                       |                        |                       |
| T1                      | 69/70           | 1.00                 | -                     | 1.00                  | -                     | 1.00                   | -                     |
| T2                      | 81/63           | 1.28(0.80-2.05)      | 0.308                 | 0.96(0.51-1.81)       | 0.891                 | 0.81(0.30-2.18)        | 0.680                 |
| T3                      | 54/71           | 0.75(0.45-1.25)      | 0.266                 | 0.61(0.30-1.25)       | 0.176                 | 0.71(0.18-2.80)        | 0.625                 |
| Folate                  |                 |                      |                       |                       |                       |                        |                       |
| T1                      | 84/73           | 1.00                 | -                     | 1.00                  | -                     | 1.00                   | -                     |
| T2                      | 66/62           | 0.92(0.58-1.45)      | 0.704                 | 0.88(0.49-1.56)       | 0.655                 | 0.80(0.37-1.76)        | 0.585                 |
| T3                      | 54/69           | 0.69(0.43-1.11)      | 0.123                 | 0.67(0.36-1.26)       | 0.220                 | 1.05(0.31-3.56)        | 0.955                 |
| Vitamin B <sub>12</sub> |                 |                      |                       |                       |                       |                        |                       |
| T1                      | 54/68           | 1.00                 | -                     | 1.00                  | -                     | 1.00                   | -                     |
| T2                      | 73/68           | 1.33(0.82-2.14)      | 0.248                 | 1.28(0.70-2.33)       | 0.422                 | 1.58(0.66-3.80)        | 0.302                 |
| T3                      | 77/68           | 1.41(0.87-2.30)      | 0.162                 | 1.85(0.85-4.01)       | 0.119                 | 2.62(0.88-7.74)        | 0.082                 |
| Met                     |                 |                      |                       |                       |                       |                        |                       |
| T1                      | 70/68           | 1.00                 | -                     | 1.00                  | -                     | 1.00                   | -                     |
| T2                      | 66/69           | 0.93(0.58-1.50)      | 0.768                 | 0.87(0.48-1.58)       | 0.646                 | 0.86(0.42-1.78)        | 0.692                 |
| T3                      | 68/67           | 0.98(0.60-1.61)      | 0.942                 | 0.67(0.34-1.32)       | 0.251                 | 0.72(0.32-1.64)        | 0.434                 |

|                                         |        |                 |                  |                 |                  |                 |                  |  |
|-----------------------------------------|--------|-----------------|------------------|-----------------|------------------|-----------------|------------------|--|
| Choline                                 |        |                 |                  |                 |                  |                 |                  |  |
| T1                                      | 92/71  | 1.00            | -                | 1.00            | -                | 1.00            | -                |  |
| T2                                      | 68/73  | 0.72(0.46–1.13) | 0.155            | 0.77(0.43–1.38) | 0.379            | 0.74(0.35–1.55) | 0.421            |  |
| T3                                      | 44/60  | 0.55(0.33–0.92) | <b>0.024</b>     | 0.64(0.34–1.22) | 0.174            | 0.75(0.34–1.64) | 0.469            |  |
| Betaine                                 |        |                 |                  |                 |                  |                 |                  |  |
| T1                                      | 122/65 | 1.00            | -                | 1.00            | -                | 1.00            | -                |  |
| T2                                      | 46/67  | 0.39(0.23–0.64) | <b>&lt;0.001</b> | 0.62(0.34–1.15) | 0.128            | 0.58(0.28–1.21) | 0.149            |  |
| T3                                      | 36/72  | 0.29(0.18–0.49) | <b>&lt;0.001</b> | 0.30(0.16–0.56) | <b>&lt;0.001</b> | 0.27(0.13–0.58) | <b>&lt;0.001</b> |  |
| <i>Methyl donor index<sup>f,g</sup></i> |        |                 |                  |                 |                  |                 |                  |  |
| T1                                      | 98/61  | 1.00            | -                | 1.00            | -                | -               | -                |  |
| T2                                      | 75/71  | 0.63(0.40–1.02) | 0.058            | 0.42(0.22–0.78) | <b>0.006</b>     | -               | -                |  |
| T3                                      | 31/72  | 0.28(0.16–0.48) | <b>&lt;0.001</b> | 0.19(0.09–0.41) | <b>&lt;0.001</b> | -               | -                |  |

<sup>a</sup>Nutrients related to one-carbon metabolism were categorized into tertiles according to the distribution in controls; Tertiles of vitamin B<sub>2</sub> (mg/d): T1 < 1.4, T2 1.4–1.7, T3 > 1.7; vitamin B<sub>3</sub> (mg/d): T1 < 26.5, T2 26.5–32.4, T3 > 32.4; vitamin B<sub>6</sub> (mg/d): T1 < 1.6, T2 1.6–2.0, T3 > 2.0; folate (µg/d): T1 < 238.0, T2 238.0–298.0, T3 > 298.0; vitamin B<sub>12</sub> (µg/d): T1 < 4.0, T2 4.0–5.3, T3 > 5.3; methyl donor index: T1 < -4.46; T2 -4.46–-3.47, T3 > -3.47; Met (mg/d) for men: T1 < 1377.0, T2 1377.0–1985.0, T3 > 1985.0; Met (mg/d) for women: T1 < 1665.0, T2 1665.0–2531.0, T3 > 2531.0; total choline (mg/d): T1 < 117.0, T2 117.0–187.0, T3 > 187.0; betaine (mg/d): T1 < 119.0, T2 119.0–170.0, T3 > 170.0

<sup>b</sup>Model I, analyses were performed using crude conditional logistic regression, without considering confounding factors

<sup>c</sup>Model II, analyses were performed using conditional logistic regression analysis adjusted for age (50–59 years old, 60–69 years old), sex, body mass index (underweight/normal weight, overweight/obesity), energy intake (kcal/d), physical exercise level (< 15 min/d of cycling/sports, ≥ 15 min/d), smoking status and intensity of smoking (never; past: quit smoking ≥ 11 years ago, quit < 11 years ago; smoker: ≤ 15 cigarettes/d, > 15 cigarettes/d), alcohol intake (standard unit drinks/d, tertiles in controls: men: T1 < 0.36, T2 0.36–1.13, T3 > 1.13; women: T1 < 0.08, T2 0.8–0.69, T3 > 0.69), Deprivation Index (quintile 1–3, quintile 4–5) and Predictive Risk Modelling (level 1–2, level 3–4), including nutrient intakes separately; participants with missing data for the confounding variables were included as a separate category for these variables

<sup>d</sup>Model III, model II including all the nutrients related to one-carbon metabolism

<sup>e</sup>A value of  $p < 0.05$  was considered significant. Significant results are highlighted in bold

<sup>f</sup>Model III is not applicable because this index includes all nutrients in its construction

<sup>g</sup>This index was derived by summing standardized intake values on the log scale [(value – mean)/SD] across the 8 individual nutrients

CI Confidence interval, *Met* Methionine, *OR* Odds ratio, *T* Tertile

**Supplementary Table S5.** Association between the intake of nutrients related to one-carbon metabolism and colorectal cancer risk in women

| Nutrients <sup>a</sup>  | Case/control(n) | Model I <sup>b</sup> |                       | Model II <sup>c</sup> |                       | Model III <sup>d</sup> |                       |
|-------------------------|-----------------|----------------------|-----------------------|-----------------------|-----------------------|------------------------|-----------------------|
|                         |                 | OR (95% CI)          | <i>p</i> <sup>e</sup> | OR (95% CI)           | <i>p</i> <sup>e</sup> | OR (95% CI)            | <i>p</i> <sup>e</sup> |
| Vitamin B <sub>2</sub>  |                 |                      |                       |                       |                       |                        |                       |
| T1                      | 29/26           | 1.00                 | -                     | 1.00                  | -                     | 1.00                   | -                     |
| T2                      | 34/44           | 0.73(0.38-1.42)      | 0.356                 | 0.88(0.37-2.05)       | 0.760                 | 3.63(0.06-221.1)       | 0.087                 |
| T3                      | 41/34           | 1.10(0.55-2.21)      | 0.794                 | 1.38(0.50-3.81)       | 0.533                 | 37.2(0.04-31674.4)     | 0.085                 |
| Vitamin B <sub>3</sub>  |                 |                      |                       |                       |                       |                        |                       |
| T1                      | 31/28           | 1.00                 | -                     | 1.00                  | -                     | 1.00                   | -                     |
| T2                      | 27/46           | 0.49(0.23-1.05)      | 0.065                 | 0.18(0.05-0.66)       | 0.010                 | 0.02(0.00-0.62)        | <b>0.027</b>          |
| T3                      | 46/30           | 1.36(0.66-2.80)      | 0.402                 | 0.78(0.22-2.74)       | 0.693                 | 1.77(0.07-41.72)       | 0.724                 |
| Vitamin B <sub>6</sub>  |                 |                      |                       |                       |                       |                        |                       |
| T1                      | 25/19           | 1.00                 | -                     | 1.00                  | -                     | 1.00                   | -                     |
| T2                      | 46/50           | 0.74(0.38-1.43)      | 0.367                 | 0.55(0.22-1.33)       | 0.182                 | 0.28(0.00-20.53)       | 0.563                 |
| T3                      | 33/35           | 0.74(0.36-1.55)      | 0.430                 | 0.48(0.18-1.33)       | 0.158                 | 0.82(0.01-55.58)       | 0.928                 |
| Folate                  |                 |                      |                       |                       |                       |                        |                       |
| T1                      | 28/29           | 1.00                 | -                     | 1.00                  | -                     | 1.00                   | -                     |
| T2                      | 37/42           | 0.90(0.45-1.80)      | 0.769                 | 0.45(0.17-1.15)       | 0.094                 | 0.07(0.00-2.60)        | 0.150                 |
| T3                      | 39/33           | 1.18(0.61-2.28)      | 0.622                 | 0.67(0.27-1.64)       | 0.381                 | 0.01(0.00-1.13)        | 0.056                 |
| Vitamin B <sub>12</sub> |                 |                      |                       |                       |                       |                        |                       |
| T1                      | 32/34           | 1.00                 | -                     | 1.00                  | -                     | 1.00                   | -                     |
| T2                      | 35/35           | 1.07(0.54-2.13)      | 0.849                 | 1.33(0.53-3.37)       | 0.542                 | 0.04(0.00-1.39)        | 0.075                 |
| T3                      | 37/35           | 1.13(0.57-2.25)      | 0.725                 | 0.89(0.29-2.77)       | 0.844                 | 0.01(0.00-1.94)        | 0.087                 |
| Met                     |                 |                      |                       |                       |                       |                        |                       |
| T1                      | 41/34           | 1.00                 | -                     | 1.00                  | -                     | 1.00                   | -                     |
| T2                      | 46/35           | 1.13(0.61-2.09)      | 0.708                 | 1.14(0.54-2.42)       | 0.726                 | 0.99(0.15-6.37)        | 0.992                 |
| T3                      | 17/35           | 0.48(0.24-0.94)      | 0.034                 | 0.31(0.11-0.86)       | 0.024                 | 0.01(0.00-2.37)        | 0.098                 |

|                                         |       |                 |                  |                 |              |                  |              |  |
|-----------------------------------------|-------|-----------------|------------------|-----------------|--------------|------------------|--------------|--|
| Choline                                 |       |                 |                  |                 |              |                  |              |  |
| T1                                      | 55/32 | 1.00            | -                | 1.00            | -            | 1.00             | -            |  |
| T2                                      | 31/29 | 0.70(0.35–1.43) | 0.330            | 0.35(0.12–0.98) | <b>0.046</b> | 0.13(0.01–2.47)  | 0.176        |  |
| T3                                      | 18/43 | 0.27(0.13–0.56) | <b>&lt;0.001</b> | 0.21(0.07–0.60) | <b>0.004</b> | 1.57(0.09–26.34) | 0.755        |  |
| Betaine                                 |       |                 |                  |                 |              |                  |              |  |
| T1                                      | 72/37 | 1.00            | -                | 1.00            | -            | 1.00             | -            |  |
| T2                                      | 18/37 | 0.26(0.12–0.54) | <b>&lt;0.001</b> | 0.28(0.11–0.74) | 0.011        | 0.01(0.00–1.59)  | 0.077        |  |
| T3                                      | 14/30 | 0.26(0.12–0.56) | <b>&lt;0.001</b> | 0.18(0.06–0.50) | <b>0.001</b> | 0.00(0.00–0.78)  | <b>0.041</b> |  |
| <i>Methyl donor index<sup>f,g</sup></i> |       |                 |                  |                 |              |                  |              |  |
| T1                                      | 57/41 | 1.00            | -                | 1.00            | -            | -                | -            |  |
| T2                                      | 37/32 | 0.92(0.46–1.86) | 0.824            | 0.87(0.35–2.14) | 0.762        | -                | -            |  |
| T3                                      | 10/31 | 0.27(0.12–0.61) | <b>0.002</b>     | 0.27(0.09–0.77) | <b>0.015</b> | -                | -            |  |

<sup>a</sup>Nutrients related to one-carbon metabolism were categorized into tertiles according to the distribution in controls; Tertiles of vitamin B<sub>2</sub> (mg/d): T1 < 1.4, T2 1.4–1.7, T3 > 1.7; vitamin B<sub>3</sub> (mg/d): T1 < 26.5, T2 26.5–32.4, T3 > 32.4; vitamin B<sub>6</sub> (mg/d): T1 < 1.6, T2 1.6–2.0, T3 > 2.0; folate (µg/d): T1 < 238.0, T2 238.0–298.0, T3 > 298.0; vitamin B<sub>12</sub> (µg/d): T1 < 4.0, T2 4.0–5.3, T3 > 5.3; methyl donor index: T1 < -4.46; T2 -4.46–-3.47, T3 > -3.47; Met (mg/d) for men: T1 < 1377.0, T2 1377.0–1985.0, T3 > 1985.0; Met (mg/d) for women: T1 < 1665.0, T2 1665.0–2531.0, T3 > 2531.0; total choline (mg/d): T1 < 117.0, T2 117.0–187.0, T3 > 187.0; betaine (mg/d): T1 < 119.0, T2 119.0–170.0, T3 > 170.0

<sup>b</sup>Model I, analyses were performed using crude conditional logistic regression, without considering confounding factors

<sup>c</sup>Model II, analyses were performed using conditional logistic regression analysis adjusted for age (50–59 years old, 60–69 years old), sex, body mass index (underweight/normal weight, overweight/obesity), energy intake (kcal/d), physical exercise level (< 15 min/d of cycling/sports, ≥ 15 min/d), smoking status and intensity of smoking (never; past: quit smoking ≥ 11 years ago, quit < 11 years ago; smoker: ≤ 15 cigarettes/d, > 15 cigarettes/d), alcohol intake (standard unit drinks/d, tertiles in controls: men: T1 < 0.36, T2 0.36–1.13, T3 > 1.13; women: T1 < 0.08, T2 0.8–0.69, T3 > 0.69), Deprivation Index (quintile 1–3, quintile 4–5) and Predictive Risk Modelling (level 1–2, level 3–4), including nutrient intakes separately; participants with missing data for the confounding variables were included as a separate category for these variables

<sup>d</sup>Model III, model II including all the nutrients related to one-carbon metabolism

<sup>e</sup>A value of  $p < 0.05$  was considered significant. Significant results are highlighted in bold

<sup>f</sup>Model III is not applicable because this index includes all nutrients in its construction

<sup>g</sup>This index was derived by summing standardized intake values on the log scale [(value – mean)/SD] across the 8 individual nutrients

*CI* Confidence interval, *Met* Methionine, *OR* Odds ratio, *T* Tertile
